# Supplementary material for: Neural representation of time across complementary reference frames
Source: eLife. 2026 May 8;14:RP107273. doi: 10.7554/eLife.107273 (PMC13155752; doi:10.7554/eLife.107273)
Supplement: Figure 1—source data 1. [file elife-107273-fig1-data1.xlsx]

## Sheet: OddParticipants
Parts of the Day	Sequence	Duration	Narrative	English Translation
Morning	1	1	Alla mattina, appena sveglio, ogni abitante della tribù si dovrà recare nel sacro campo delle Candele, dove dovrà accendere parte delle candele per un'ora.	In the morning, as soon as they wake up, each tribesman must go to the sacred Candle Field, where they must light some of the candles for an hour.
	2	0.5	Una volta finito ciò, essi dovranno recitare singolarmente tutte le preghiere trascritte dal profeta Ilah nel libro sacro. Questo richiederà loro circa mezz'ora.	Once this is finished, they must individually recite all the prayers transcribed by the Prophet Ilah in the holy book. This will take them about half an hour.
	3	2	A seguire, suoneranno la propria campanella sacra per due ore, in modo da scacciare gli spiriti maligni.	Next, they will ring their sacred bell for two hours to ward off evil spirits.
	4	0.5	Dopodichè, essi dovranno realizzare degli origami per mezz’ora, attività estremamente cara al profeta Ilah.	Afterwards, they must make origami for half an hour, an activity extremely dear to the Prophet Ilah.
	5	2	A fine mattinata essi si dirigeranno alle sacre terme dove si immergeranno nell’acqua sacra per due ore.	At the end of the morning, they will head to the sacred baths where they will immerse themselves in the sacred waters for two hours.
Afternoon	6	0.5	Le funzioni del pomeriggio inizieranno con la adorazione della reliquia del profeta Ilah della durata di mezz'ora.	The afternoon services will begin with the adoration of the relic of the Prophet Ilah for half an hour.
	7	2	Alla fine di essa, ogni abitante dovrà annotarsi nel proprio diario dei buoni propositi per due ore.	At the end of this, each tribesman must write down good intentions in their diary for two hours.
	8	2	Terminato ciò, essi dovranno cantare, in piccoli gruppi, degli inni sacri per altre due ore.	After this, they must sing sacred hymns in small groups for another two hours.
	9	1	A seguire, essi dovranno meditare in solitudine sul senso della vita per un'ora.	Afterwards, they will meditate alone on the meaning of life for an hour.
	10	0.5	Il pomeriggio terminerà con un colloquio di mezz’ora con un sacerdote.	The afternoon will conclude with a half-hour conversation with a priest.
Evening	11	2	All’inizio dell’ultima parte del giorno, la sera, ogni abitante della tribù dovrà piantare una quercia sacra nel proprio giardino. Questo richiederà all’incirca due ore.	At the beginning of the last part of the day, in the evening, each tribesman will plant a sacred oak tree in their garden. This will take approximately two hours.
	12	0.5	Una volta finito ciò, ognuno dovrà esercitarsi nella respirazione per mezz'ora, per rilassare il diaframma e riappacificarsi con sé stesso.	Once this is finished, everyone will practice breathing for half an hour to relax the diaphragm and find peace within themselves.
	13	2	Al termine di ciò, essi dovranno cuocere la torta sacra seguendo la preziosa ricetta del profeta Ilah. Essa ha un tempo di preparazione di circa due ore.	After this, they will bake the sacred cake following the precious recipe of the Prophet Ilah. It takes approximately two hours to prepare.
	14	0.5	A seguire, ci sarà la visita al tempio dedicato al profeta per mezz’ora.	This will be followed by a visit to the temple dedicated to the Prophet for half an hour.
	15	1	Infine, tutti dovranno ballare una danza sacra ideata dal profeta stesso per circa un'ora.	Finally, everyone will dance a sacred dance created by the Prophet himself for approximately one hour.

## Sheet: EvenPartcipants
Parts of the Day	Sequence	Duration	Narrative	English Translation
Morning	1	1	Alla mattina, appena sveglio, ogni abitante della tribù dovrà ballare una danza sacra ideata dal profeta stesso per circa un'ora.	In the morning, as soon as they wake up, each tribesman will dance a sacred dance created by the Prophet himself for approximately one hour.
	2	0.5	Una volta finito ciò, essi dovranno cuocere la torta sacra seguendo la preziosa ricetta del profeta Ilah. Essa ha un tempo di preparazione di circa mezz'ora.	Once this is finished, they will have to bake the sacred cake following the precious recipe of Prophet Ilah. Its preparation takes about half an hour.
	3	2	Ultimata la preparazione, a seguire ci sarà un colloquio di due ore con un sacerdote.	Once the preparation is complete, there will be a two-hour conversation with a priest.
	4	0.5	Dopodichè, ogni abitante si dovrà esercitare nella respirazione per mezz'ora, per rilassare il diaframma e riappacificarsi con sé stesso.	Afterwards, each inhabitant will have to practice breathing for half an hour, to relax the diaphragm and find peace within themselves.
	5	2	A fine mattinata ci sarà la visita al tempio dedicato al profeta per due ore.	At the end of the morning, there will be a two-hour visit to the temple dedicated to the prophet.
Afternoon	6	0.5	Le funzioni del pomeriggio inizieranno con una meditazione in solitudine sul senso della vita della durata di mezz'ora.	The afternoon services will begin with a half-hour solitude meditation on the meaning of life.
	7	2	Alla fine di essa, ogni abitante dovrà recitare singolarmente tutte le preghiere trascritte dal profeta Ilah nel libro sacro. Questo richiederà loro circa due ore.	At the end of this, each inhabitant will have to individually recite all the prayers transcribed by the prophet Ilah in the holy book. This will take them approximately two hours.
	8	2	Terminato ciò, ogni abitante della tribù dovrà piantare una quercia sacra nel proprio giardino. Questo richiederà all’incirca due ore.	After this, each tribesman will have to plant a sacred oak tree in their own garden. This will take approximately two hours.
	9	1	A seguire, essi dovranno cantare, in piccoli gruppi, degli inni sacri per un'ora.	Next, they will have to sing sacred hymns in small groups for an hour.
	10	0.5	Al termine del pomeriggio essi si dovranno annotare nel proprio diario dei buoni propositi per mezz'ora.	At the end of the afternoon, they will have to write down good intentions in their diaries for half an hour.
Evening	11	2	All’inizio dell’ultima parte del giorno, la sera, essi dovranno realizzare degli origami per due ore, attività estremamente cara al profeta Ilah.	At the beginning of the last part of the day, in the evening, they will have to make origami for two hours, an extremely dear activity to Prophet Ilah.
	12	0.5	Una volta finito ciò, ognuno dovrà adorare la reliquia del profeta Ilah per mezz'ora.	Once this is finished, everyone must worship the relics of Prophet Ilah for half an hour.
	13	2	Al termine di ciò, essi si dovranno recare nel sacro campo delle Candele, dove dovranno accendere parte delle candele per due ore.	Afterwards, they will have to go to the sacred Field of Candles, where they will light some of the candles for two hours.
	14	0.5	A seguire, essi si dirigeranno alle sacre terme dove si immergeranno nell’acqua sacra per mezz’ora.	Next, they will head to the sacred baths where they will immerse themselves in the sacred waters for half an hour.
	15	1	Infine, tutti dovranno suonare la propria campanella sacra per un'ora, in modo da scacciare gli spiriti maligni.	Finally, everyone must ring their sacred bell for an hour to drive away evil spirits.

## Sheet: AllParticipants
Parts of the Day	Sequence	Duration	Event Phrase
		(Hours)	Odd Number Participants	Even Number Participants
Morning	1	1	light some candles	dance the sacred dance
	2	0.5	recite the prayers	prepare the sacred cake
	3	2	ring the bell	talk to a priest
	4	0.5	make an origami	practice breathing
	5	2	dive into the water	visit the temple
Afternoon	6	0.5	worship the relic	meditate on life
	7	2	write some resolutions	recite the prayers
	8	2	sing sacred hymns	plant an oak
	9	1	meditate on life	sing sacred hymns
	10	0.5	talk to a priest	write some resolutions
Evening	11	2	plant an oak	make an origami
	12	0.5	practice breathing	worship the relic
	13	2	prepare the sacred cake	light some candles
	14	0.5	visit the temple	dive into the water
	15	1	dance the sacred dance	ring the bell
