# Supplementary material for: Neural Representation of Time across Complementary Reference Frames
Source: eLife journal article supplement (doi:10.7554/elife.107273), 2025-07-07
Supplement: supp1 [file elife-107273-supp1-v1.pdf]

**Supplementary File 1:** The reaction time of the corrected trials indicates that time is differently processed under internal and external perspectives<sup>1</sup>

| Fixed Effects <sup>2</sup>       | df      | F      | p       |
|----------------------------------|---------|--------|---------|
| Sequential Distance              | 1, 6914 | 0.018  | 0.895   |
| Duration                         | 1, 6914 | 7.687  | 0.006   |
| Same vs. Different               | 1, 6914 | 0.862  | 0.353   |
| Future vs. Past                  | 1, 6914 | 0.088  | 0.766   |
| Syllable Length                  | 1, 6914 | 33.222 | < 0.001 |
| Task Type                        | 1, 6914 | 5.845  | 0.016   |
| Task Type × Sequential Distance  | 1, 6914 | 13.959 | < 0.001 |
| Task Type × Duration             | 1, 6914 | 6.246  | 0.012   |
| Task Type × (Same vs. Different) | 1, 6914 | 70.490 | < 0.001 |
| Task Type × (Future vs. Past)    | 1, 6914 | 0.002  | 0.965   |
| Task Type × Syllable Length      | 1, 6914 | 0.961  | 0.327   |

<sup>1</sup> Linear Mixed Model:  $RT \sim 1 + \text{Task Type} * (\text{Sequential Distance} + \text{Duration} + \text{Same/Different} + \text{Future/Past} + \text{Syllable Length}) + (1 | \text{Participant})$

<sup>2</sup> The significant effects were highlighted. We did not highlight the significant main effects if the corresponding interaction effects were also significant.
